# Supplementary material for: Cetuximab and Taxol co-modified collagen scaffolds show combination effects for the repair of acute spinal cord injury
Source: Royal Society of Chemistry journal article supplement (doi:10.1039/c8bm00363g), 2018-01-01
Supplement: c8bm00363g1.pdf [file c8bm00363g1.pdf]

## Supporting Information

### Cetuximab and Taxol co-modified collagen scaffolds show combination effects for the repair of acute spinal cord injury

**Table S1.** The mortality rate of SCI rats in each treatment group.

| Grouping         | Control | Material | Taxol | Cetuximab | Combined treatment |
|------------------|---------|----------|-------|-----------|--------------------|
| Total animals    | 20      | 15       | 15    | 15        | 15                 |
| Survival animals | 12      | 13       | 13    | 13        | 13                 |
| Mortality rate   | 40%     | 13.3%    | 13.3% | 13.3%     | 13.3%              |

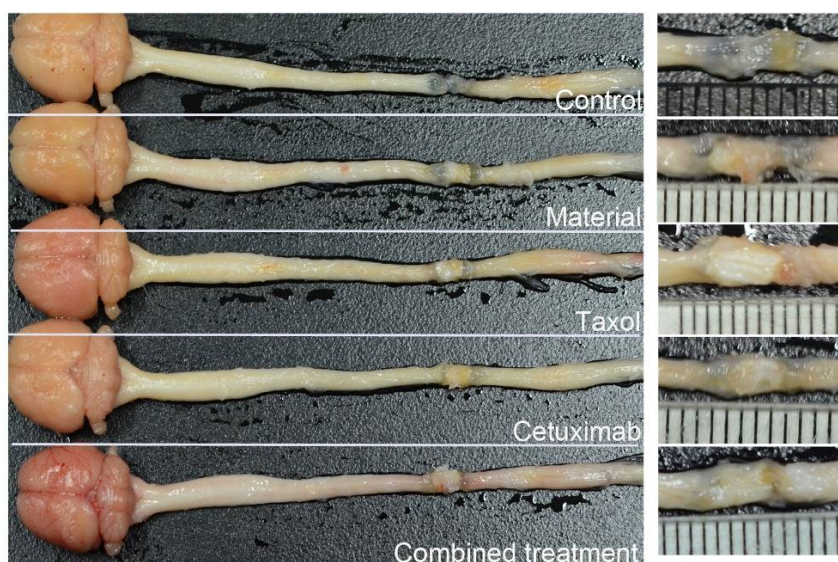

Fig. S1 Anatomical changes of the injured spinal cord in different treatment groups. In the control group, severe tissue necrosis at the edge of the injured region occurred. There was a certain degree of necrosis in the material group, while the combined treatment group had the lowest degree of necrosis.

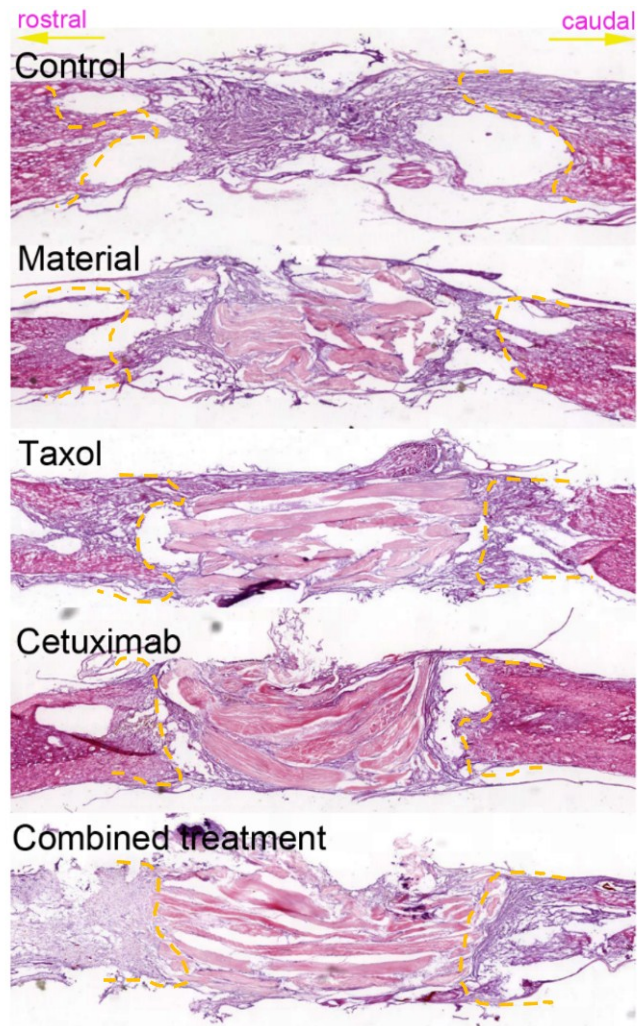

Fig. S2 Cavity formation beyond the injured area in the different treatment groups. The cavities were observed by H&E staining. In the control group, large cavities appeared on both sides of the injured area, and there was some degree of cavity formation in the material group. However, the combined treatment group had the lowest degree of cavity formation.
